# Supplementary material for: Rapid Sample Screening Method for Authenticity Controlling of Vanilla Flavours Using Liquid Chromatography with Electrochemical Detection Using Aluminium-Doped Zirconia Nanoparticles-Modified Electrode
Source: MDPI journal article supplement (doi:10.3390/molecules27092915), 2022-05-03
Supplement: s1 [file s1]

## Electronic Supplementary Materials

### Rapid Sample Screening Method for Authenticity Controlling of Vanilla Flavours Using Liquid Chromatography with Electrochemical Detection Using Aluminium-Doped Zirconia Nanoparticles-Modified Electrode

Yassine Benmassaoud <sup>1,2,3</sup>, Khaled Murtada <sup>1,2,†</sup>, Rachid Salghi <sup>3</sup>, Mohammed Zougagh <sup>1,2</sup> and Ángel Ríos <sup>1,2,\*</sup>

<sup>1</sup> Department of Analytical Chemistry and Food Technology, Faculty of Pharmacy, University of Castilla-La Mancha, 13071 Ciudad Real, Spain; yassinebenmassaoud@gmail.com (Y.B.); kmurtada@uwaterloo.ca (K.M.); mohammed.zougagh@uclm.es (M.Z.)

<sup>2</sup> Analytical-NANO-Group, Regional Institute for Applied Chemistry Research (IRICA), 13071 Ciudad Real, Spain

<sup>3</sup> Laboratory of Applied Chemistry and Environment, Ecole Nationale Des Sciences Appliquées (ENSA), Université Ibn Zohr, P.O. Box 1136, Agadir 80000, Morocco; r.salghi@uiz.ac.ma

\* Correspondence: angel.rios@uclm.es

† Current Address: Department of Chemistry, University of Waterloo, 200 University Avenue West, Waterloo, ON N2L 3G1, Canada.

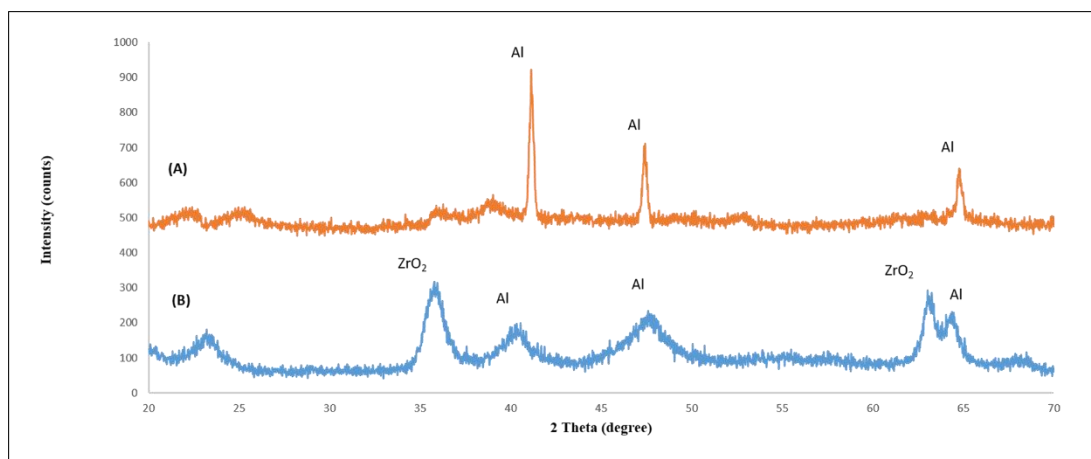

**Figure S1.** XRD patterns measured for (A) Al-NPs and (B) Al-ZrO<sub>2</sub>-NPs.

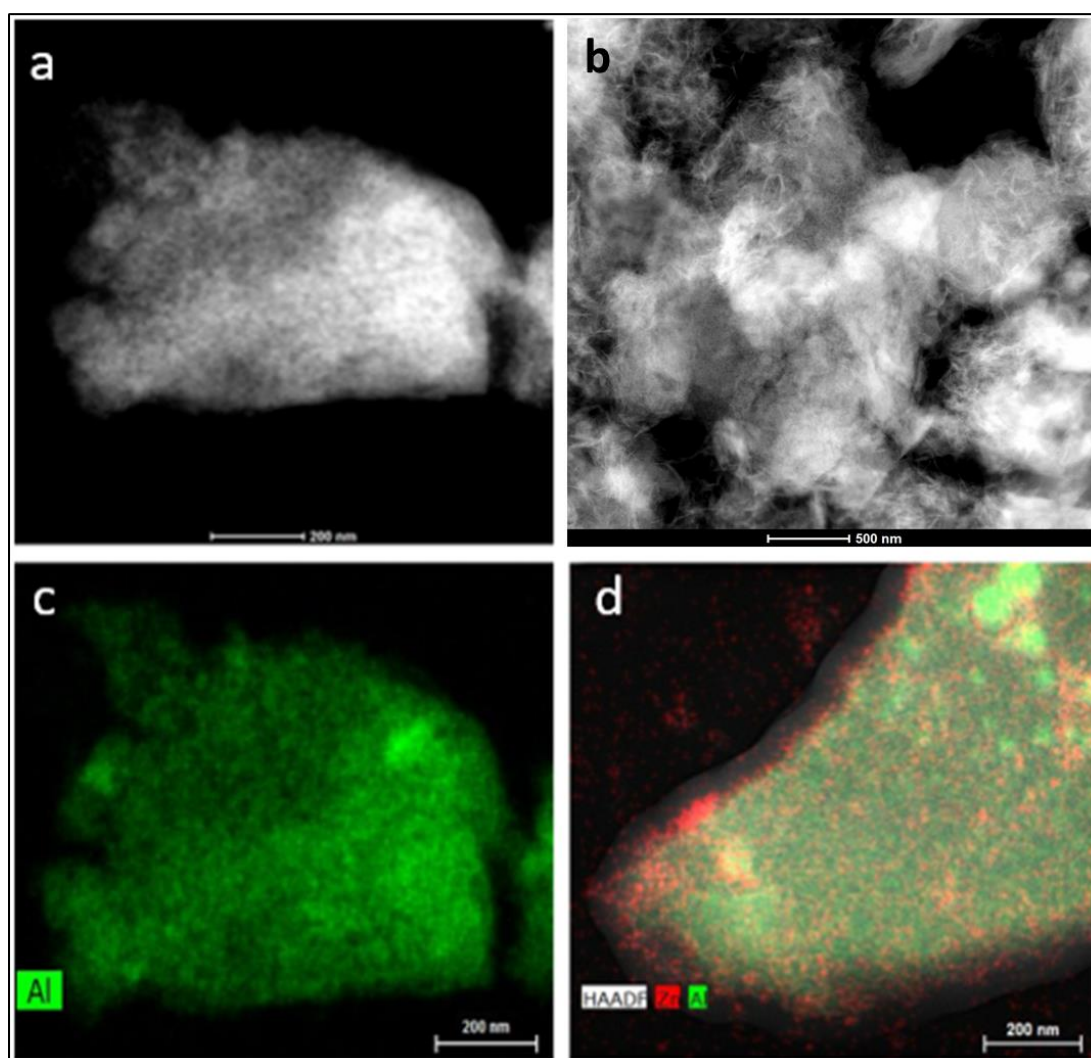

**Figure S2.** TEM and EDX micrographs of Al-NPs (a and c) and Al-ZrO<sub>2</sub>-NPs (b and d).

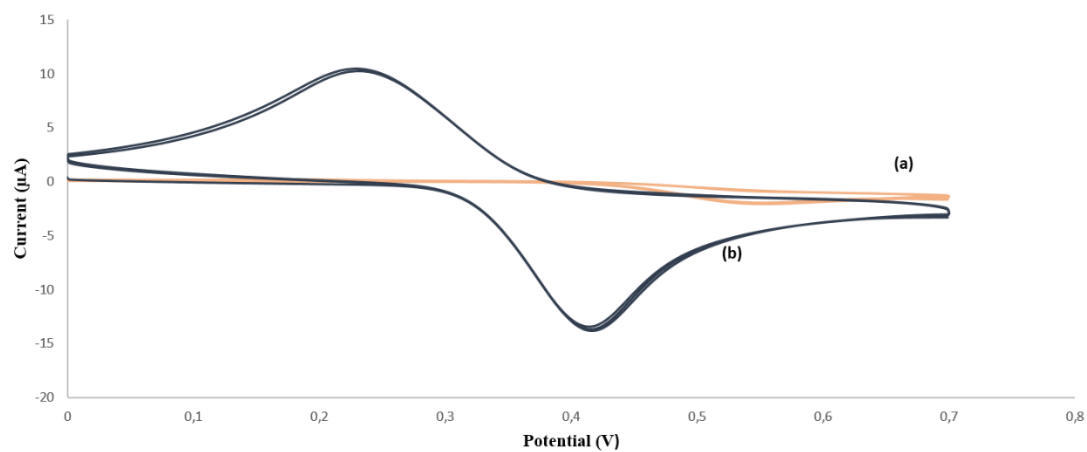

**Figure S3.** The cyclic voltammograms of 0.1 mM of dopamine in phosphoric acid solution (0.1 M) as electrolyte, 50 mV/s scan rate. (a) SPCE and (b) Al-ZrO<sub>2</sub>-NPs/SPCE.
